# Supplementary material for: Feasibility of establishing a rehabilitation programme in a Vietnamese intensive care unit
Source: PubMed Central journal article supplement (PMC7928504; doi:10.1371/journal.pone.0247406), 2021-03-03
Supplement: pone.0247406.s003.pdf [file pone.0247406.s003.pdf]

**BẢNG CÂU HỎI CHO BỆNH NHÂN/THÂN NHÂN**

| CÂU HỎI                                                                                         | LOẠI CÂU TRẢ LỜI                   |
|-------------------------------------------------------------------------------------------------|------------------------------------|
|                                                                                                 | 0 hoàn toàn không – 5 hoàn toàn có |
| Q1. Các bài tập có khó hiểu/khó thực hiện ?                                                     | 0 1 2 3 4 5                        |
|                                                                                                 | 0 hoàn toàn không – 5 rất nhiều    |
| Q2. Các bài tập có làm bạn mệt ?                                                                | 0 1 2 3 4 5                        |
| Q3. Bạn có muốn tập PHCN/giúp BN tập ?                                                          | 0 1 2 3 4 5                        |
| Q4. Tài liệu in có hữu ích đối với bạn ? Thêm hay bớt ? Tại sao ?                               | 0 1 2 3 4 5                        |
| Q5. Bạn gặp khó khăn gì khi tập PHCN ?                                                          |                                    |
| Q6. Bạn thấy chương trình PHCN thế nào ? (Ấn tượng)                                             |                                    |
| Q7. Bạn thích tập với ai ?                                                                      | BS/ĐD/KTV VLTL                     |
| Q8. Khi bạn có thắc mắc, bạn có được giải quyết ngay ?                                          | Có/Không                           |
| Q9. Bạn đã từng gặp KTV VLTL trước đây chưa ?                                                   | Có/Không                           |
| Q10. Lợi ích nhất và bất tiện nhất khi bạn tập PHCN ?                                           |                                    |
| Q11. Khó khăn khi tập PHCN ở nhà ?                                                              |                                    |
| Q12. Thân nhân nghĩ gì khi bạn tập PHCN ?                                                       |                                    |
| Q13. Yếu tố gì chi phối khi bạn tập PHCN tại nhà ?                                              |                                    |
| Q14. ĐD/KTV hướng dẫn có khó hiểu ?                                                             | Có/Không                           |
| Q15. Bạn có cảm thấy an toàn nếu tập PHCN ở nhà ? Tại sao ?<br>Chúng tôi giúp gì cho bạn được ? | Có/Không – cụ thể                  |
| Q16. Yếu tố chính nào giúp bạn tập chủ động được ?                                              |                                    |
| Q17. Yếu tố chính nào ngăn cản bạn không tập chủ động được ?                                    |                                    |
| Q18. Kinh nghiệm của bạn khi tập PHCN tại bệnh viện ?                                           |                                    |

Chú thích: BN: bệnh nhân; BS: bác sĩ; KTV: kỹ thuật viên; PHCN: phục hồi chức năng; VLTL: vật lý trị liệu

**BẢNG CÂU HỎI DÀNH CHO NHÂN VIÊN Y TẾ**

| <b>CÂU HỎI</b>                                                        | <b>LOẠI</b>                        |
|-----------------------------------------------------------------------|------------------------------------|
|                                                                       | 0 hoàn toàn không – 5 hoàn toàn có |
| Q1. Các bài tập có khó hướng dẫn cho BN?                              | 0 1 2 3 4 5                        |
| Q2. Bài tập nào bạn có thể làm tốt nhất ?                             |                                    |
| Q3. Bài tập nào có thể chỉnh sửa để tốt hơn ?                         |                                    |
| Q4. Booklet hay video theo bạn là tốt ?                               | Video/ booklet/cả hai              |
|                                                                       | 0 hoàn toàn không – 5 rất nhiều    |
| Q5. Bạn có muốn TN giúp BN tập PHCN?                                  | 0 1 2 3 4 5                        |
| Q6. Tài liệu in có hữu ích đối với bạn?                               | 0 1 2 3 4 5                        |
| Q7. Tài liệu video có hữu ích đối với bạn?                            | 0 1 2 3 4 5                        |
| Q8. Booklet hay video có cần chỉnh sửa gì không ?                     |                                    |
| Q9. Bạn có gặp khó khăn gì khi tập PHCN cho BN?                       |                                    |
| Q10. Bạn có đề nghị gì giúp việc tập PHCN được tốt hơn?               |                                    |
| Q11. Bạn có kinh nghiệm gì khi tập PHCN cho BN ?                      |                                    |
| Q12. Suy nghĩ của bạn về chương trình PHCN ?                          |                                    |
| Q13. Bạn có khó khăn khi cần trao đổi với ĐD/BS Khoa khi tập cho BN ? |                                    |
| <i>Bạn làm ĐD bao nhiêu năm ? Bằng cấp ?</i>                          |                                    |

*Chú thích: BN: bệnh nhân; BS: bác sĩ; ĐD: điều dưỡng; PHCN: phục hồi chức năng; TN: thân nhân*

**PATIENT QUESTIONNAIRE**

| <b>QUESTION</b>                                                                                | <b>TYPE OF ANSWER</b>             |
|------------------------------------------------------------------------------------------------|-----------------------------------|
| Q1. Were the exercises difficult to understand or to do?                                       | 0 not at all – 5 impossible       |
| Q2. Was you tired when doing the exercises?                                                    | 0 not at all – 5 very much so     |
| Q3. Do you want to undertake/help patient undertaking exercises?                               | 0 not at all – 5 very much so     |
| Q4. Did you find the printed book helpful?                                                     | 0 not at all – 5 very much so     |
| Q5. What were the challenges with undertaking exercise program?                                | Open question                     |
| Q6. Can you tell me what your impression of the exercise program was?                          | Open question                     |
| Q7. Who you want to guide you to undertake exercises?                                          | Rehab technician, doctor or nurse |
| Q8. Did you find the program physio and nurse consultations were available at the right time ? | Yes/ no                           |
| Q9. Have you ever meet a physiotherapist/rehab technician?                                     | Yes/no                            |
| Q10. What was the most/least valuable aspect of participating in this study?                   | Open question                     |
| Q11. What are your thoughts on the challenges with undertaking exercise program at HOME?       | Open question                     |
| Q12. What are the thoughts of your family / friends on you undertaking the exercise program?   | Open question                     |
| Q13. What factors are relevant to undertake exercise program at home ?                         | Open question                     |
| Q14. Did you feel supported and able to be guided with your exercises by the physiotherapist ? | Yes/ no                           |
| Q15. Do you think it is safe to exercise at HOME? Why? How could we have helped?               | Yes/ no specify                   |
| Q16. What are the main factors that enable you to be active at the moment ?                    | Open question                     |

|                                                                                        |               |
|----------------------------------------------------------------------------------------|---------------|
| Q17. What are the main factors that prevent you from being physically active?          | Open question |
| Q18. What is your experience regarding to the exercise program during hospitalization? | Open question |

**NURSE QUESTIONNAIRE**

| <b>QUESTION</b>                                                                                                                                     | <b>TYPE</b>                   |
|-----------------------------------------------------------------------------------------------------------------------------------------------------|-------------------------------|
| Q1. Do you find the exercises difficult to guide for the patient?                                                                                   | 0 not at all – 5 very much so |
| Q2. Which is the best useful exercise could you guide?                                                                                              | Open question                 |
| Q3. Which exercise of the program do you feel could have been improved? Do you have any suggestions for how these aspects could have been improved? | Open question                 |
| Q4. Do you find the booklet or video helpful?                                                                                                       | Video/ booklet/ both          |
| Q5. Do you want relatives to help the patient?                                                                                                      | 0 not at all – 5 very much so |
| Q6. Is the booklet useful?                                                                                                                          | 0 not at all – 5 very much so |
| Q7. Is the video useful?                                                                                                                            | 0 not at all – 5 very much so |
| Q8. What aspects of the booklet or video do you feel could have been improved?                                                                      |                               |
| Q9. Can you tell me about any challenges that you encountered in delivering the exercise?                                                           | Open question                 |
| Q10. Do you have any suggestions for how these aspects could have been improved?                                                                    | Open question                 |
| Q11. Tell me about your experiences with the rehabilitation program                                                                                 | Open question                 |
| Q12. What was your overall impression of the intervention?                                                                                          | Open question                 |
| Q13. Did you have any difficulty in interacting with doctors or nurses when carrying out the program                                                | Open question                 |

Working time (year)

Degree
